# Supplementary material for: Masked diversity and contrasting soil processes in tropical seagrass meadows: the control of environmental settings
Source: Copernicus journal article supplement (doi:10.5194/soil-9-189-2023), 2023-03-16
Supplement: Supplementary file 1 [file soil-9-189-2023-supplement.pdf]

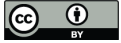

*Supplement of*

## **Masked diversity and contrasting soil processes in tropical seagrass meadows: the control of environmental settings**

**Gabriel Nuto Nóbrega et al.**

*Correspondence to:* Tiago Osório Ferreira (toferreira@usp.br)

The copyright of individual parts of the supplement might differ from the article licence.

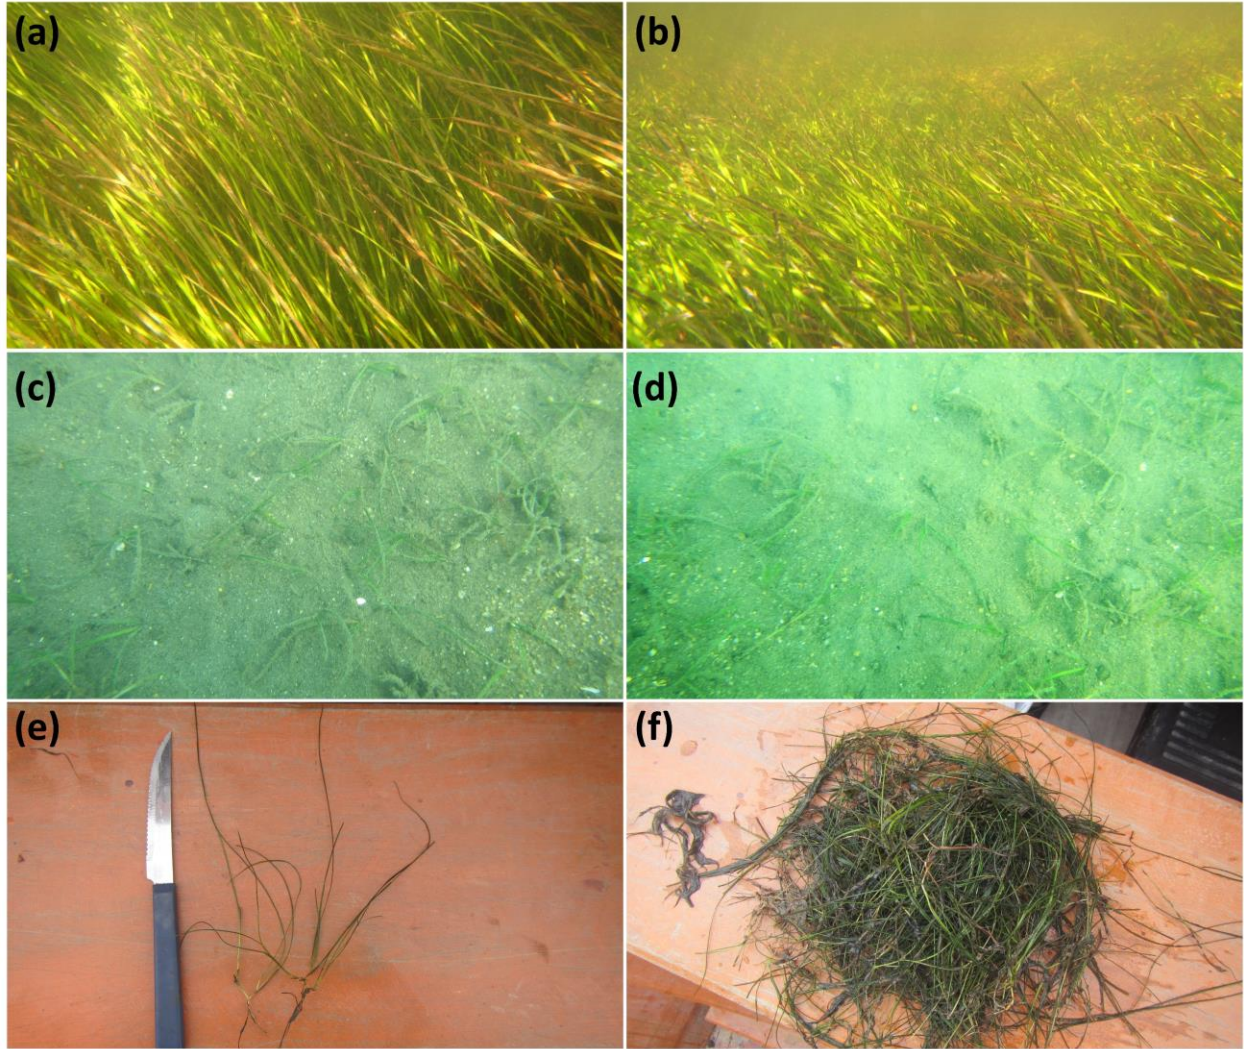

**Fig. S1** Different plant densities and biomass of studied seagrasses. In detail, the high density and biomass in the seagrass from the NE coast (a-b), compared to the low density and biomass of the SE coast (c-d), and low biomass of the S coast (e-f).

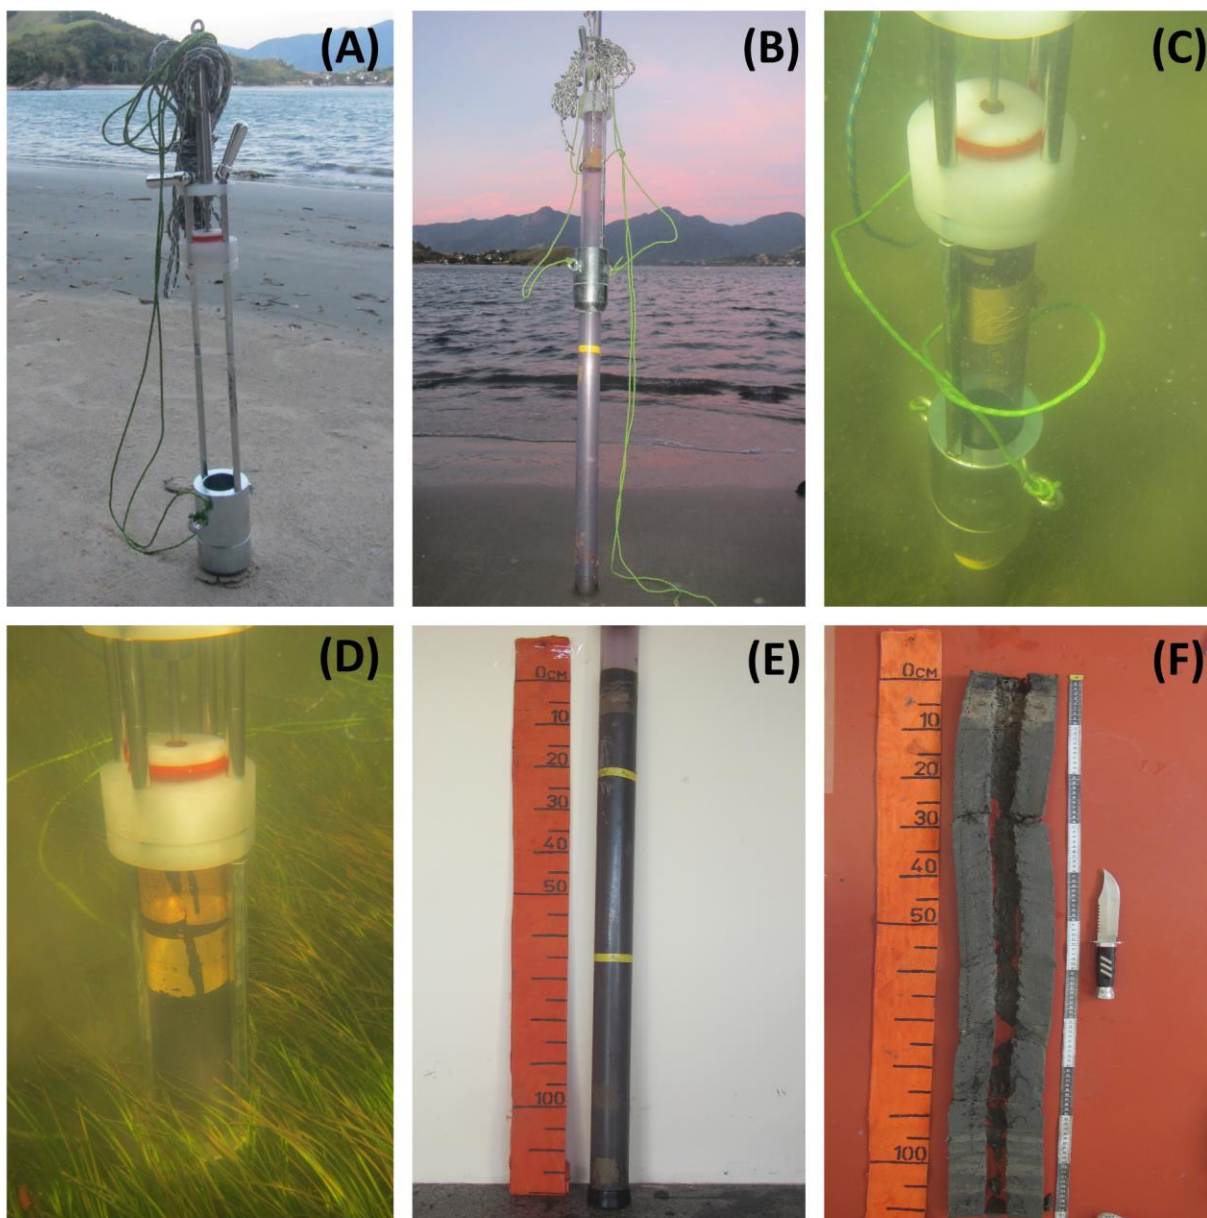

**Fig. S2** Overview of the soil sampler (A) with the tube attached (B). Remote hammering action (C and D) to insert the tube into the soil, a soil core (E) and seagrass soil profile (F).

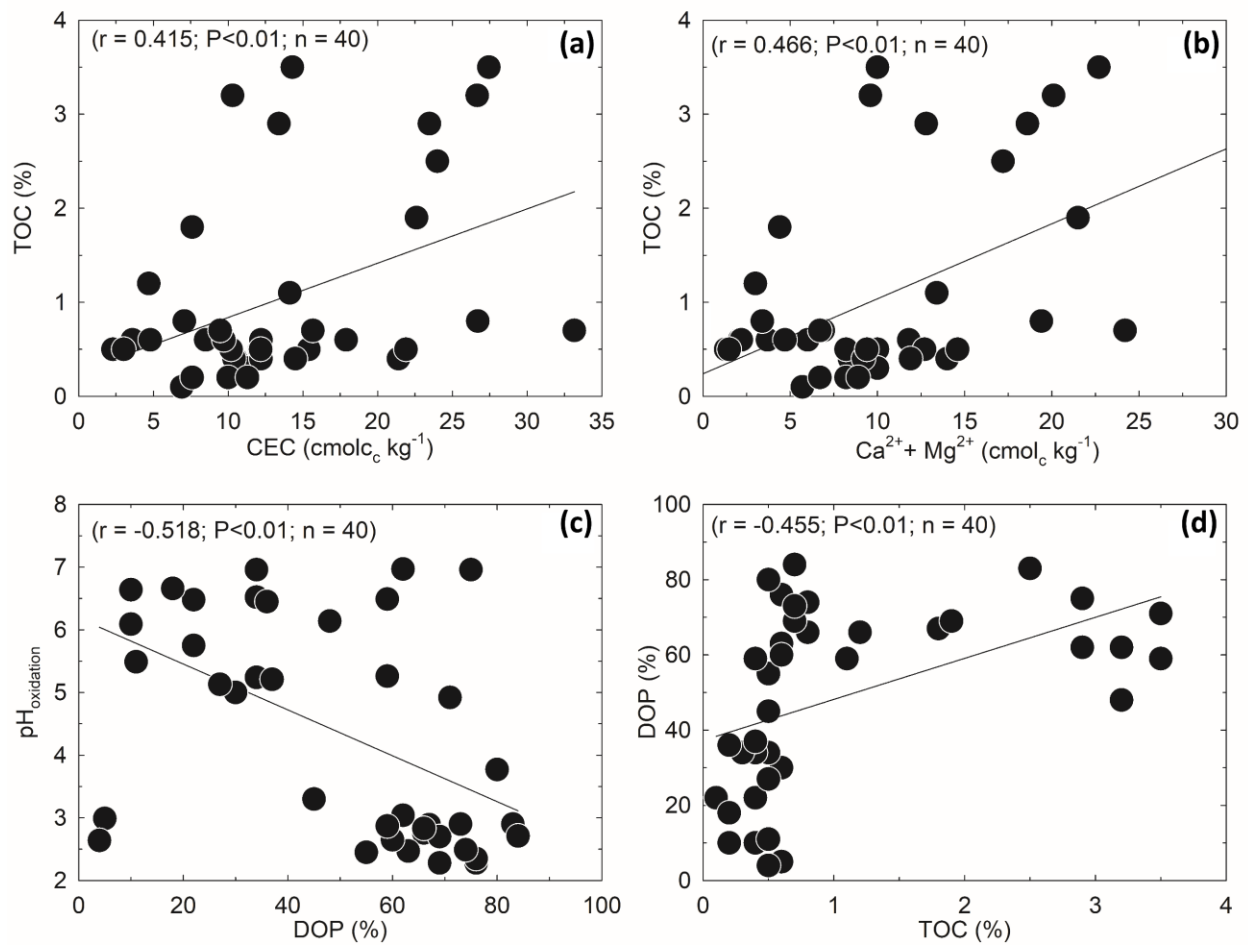

**Fig. S3** Correlation of the studied variables for the studied soils. (a) Cation exchange capacity (CEC) and total organic carbon (TOC); (b) TOC and exchangeable Ca<sup>2+</sup> + Mg<sup>2+</sup>; (c) Degree of pyritization (DOP) and pH<sub>oxidation</sub>; (d) TOC and DOP.
